# Supplementary material for: Low-dimensional phase suppression and defect passivation of quasi-2D perovskites for efficient electroluminescence and low-threshold amplified spontaneous emission
Source: Royal Society of Chemistry journal article supplement (doi:10.1039/d1nr06549a), 2021-12-07
Supplement: d1nr06549a1.pdf [file d1nr06549a1.pdf]

## Supporting Information

### **Low-Dimensional Phase Suppression and Defect Passivation of Quasi-2D Perovskites for Efficient Electroluminescence and Low-Threshold Amplified Spontaneous Emission**

Guangrong Jin,<sup>ab</sup> Tanghao Liu,<sup>c</sup> Yuanzhao Li,<sup>ab</sup> Jiadong Zhou,<sup>a</sup> Dengliang Zhang,<sup>a</sup> Peiyuan Pang,<sup>ac</sup> Ziqing Ye,<sup>a</sup> Zhaohui Xing,<sup>a</sup> Guichuang Xing,<sup>\*c</sup> Jiangshan Chen,<sup>\*a</sup> and Dongge Ma <sup>\*ab</sup>

<sup>a</sup> Institute of Polymer Optoelectronic Materials and Devices, State Key Laboratory of Luminescent Materials and Devices, Guangdong Provincial Key Laboratory of Luminescence from Molecular Aggregates, South China University of Technology, Guangzhou, Guangdong 510640, China.

E-mail: [msdgma@scut.edu.cn](mailto:msdgma@scut.edu.cn), [msjschen@scut.edu.cn](mailto:msjschen@scut.edu.cn).

<sup>b</sup> School of Physics and Optoelectronics, South China University of Technology, Guangzhou, Guangdong 510640, China.

<sup>c</sup> Joint Key Laboratory of the Ministry of Education, Institute of Applied Physics and Materials Engineering, University of Macau, Macau 999078, China.

E-mail: [gxingdgma@um.edu.mo](mailto:gxingdgma@um.edu.mo).

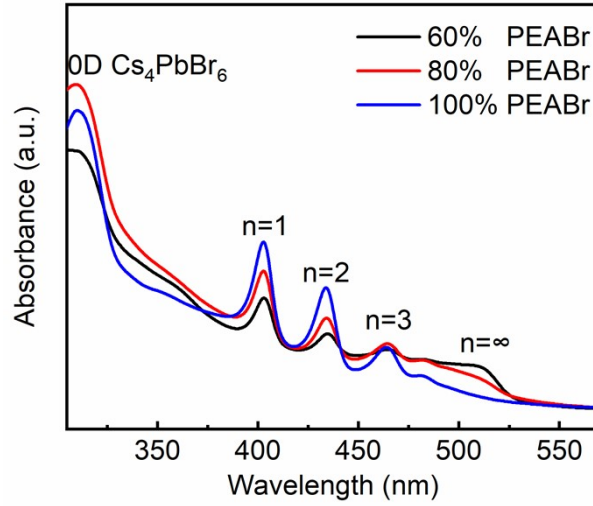

Figure S1. Absorption of the pure PEA-based perovskite films with different contents of PEABr.

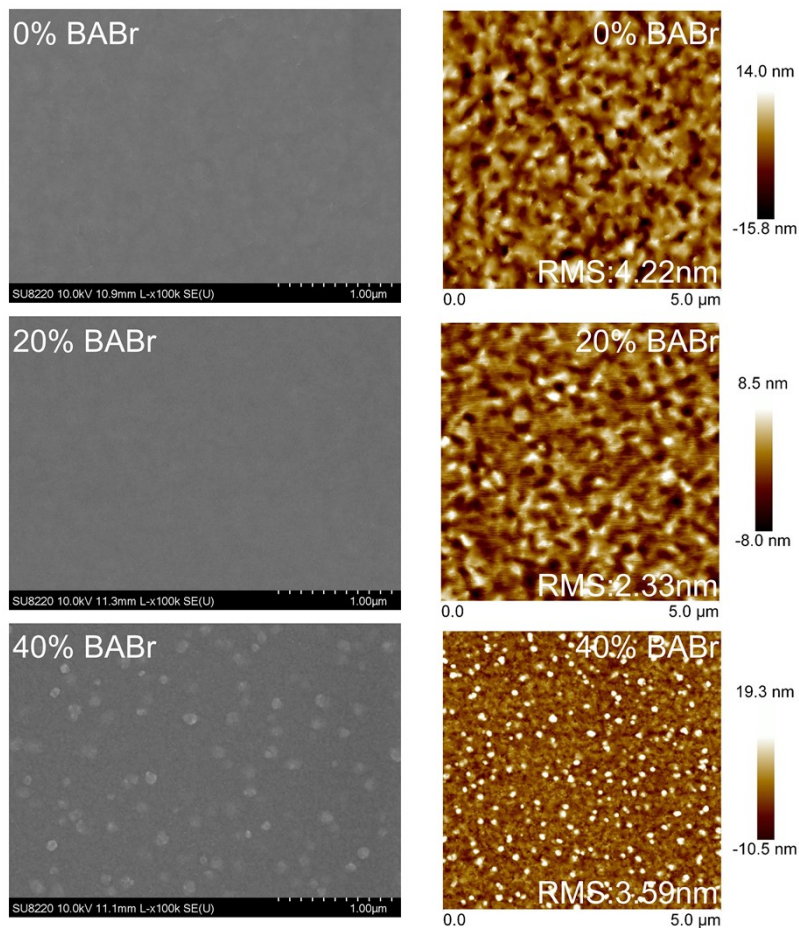

Figure S2. SEM and AFM images of the perovskite films with different contents of BABr.

**Table S1.** The FWHM of the diffraction peaks for the (200) planes of CsPbBr<sub>3</sub> determined from the XRD results.

| sample   | 2 $\theta$<br>(degree) | FWHM<br>(degree) |
|----------|------------------------|------------------|
| 0% BABr  | 30.98                  | 0.41             |
| 10% BABr | 30.95                  | 0.51             |
| 20% BABr | 30.89                  | 0.53             |
| 40% BABr | 30.94                  | 0.74             |

**Table S2.** Lifetime fitting parameters obtained from TRPL decays of the perovskite films with different contents of BABr.

| Sample   | A <sub>1</sub> | $\tau_1$<br>[ns] | A <sub>2</sub> | $\tau_2$<br>[ns] | A <sub>3</sub> | $\tau_3$<br>[ns] | $\tau_{\text{avg}}$<br>[ns] |
|----------|----------------|------------------|----------------|------------------|----------------|------------------|-----------------------------|
| 0% BABr  | 0.39           | 6.6              | 0.47           | 35.7             | 0.14           | 169.4            | 43.1                        |
| 10% BABr | 0.13           | 10.0             | 0.65           | 73.2             | 0.22           | 343.3            | 124.4                       |
| 20% BABr | 0.11           | 10.0             | 0.64           | 91.3             | 0.25           | 428.6            | 166.7                       |
| 40% BABr | 0.26           | 13.3             | 0.61           | 43.4             | 0.13           | 123.8            | 46.0                        |

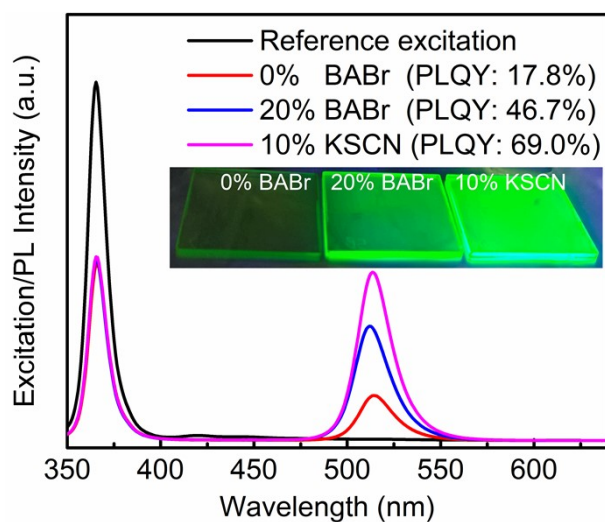

Figure S3. PLQY of the perovskite films with 0% BABr(pristine), 20% BABr and 10% KSCN (co-addition of 20% BABr). Inset: their images under 365 nm ultraviolet lamp excitation.

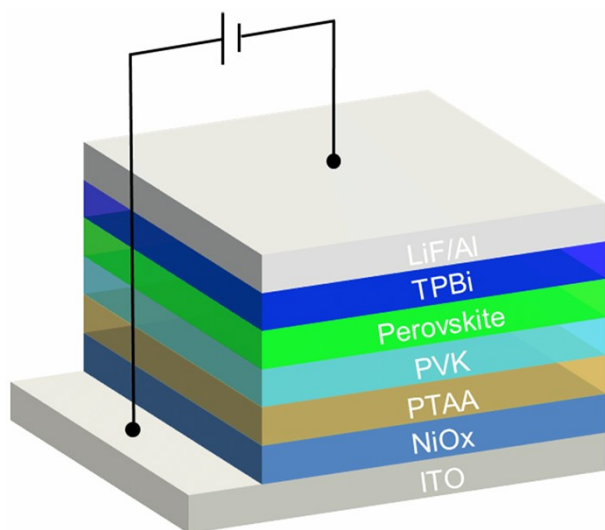

Figure S4. Device configuration diagram of the green perovskite LEDs.

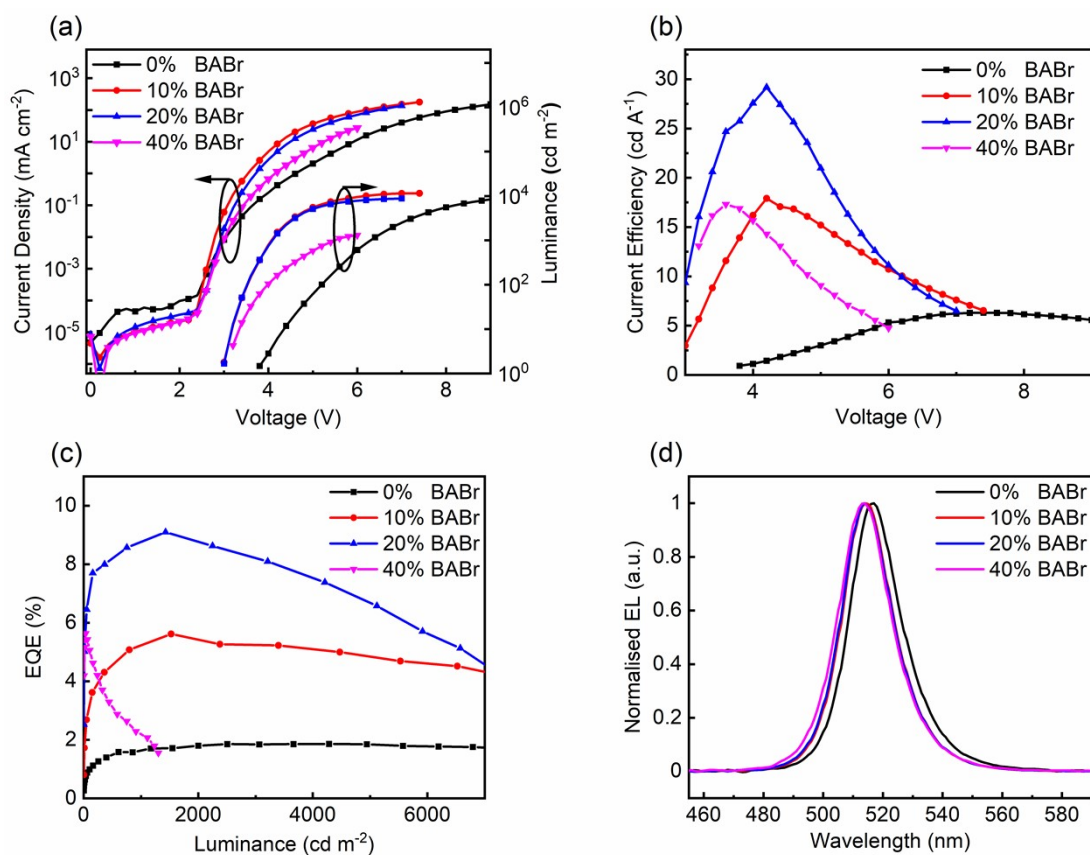

Figure S5. Device performances of the perovskite LEDs with different contents of BABr, here the content of PEABr is fixed at 40%. (a) J-L-V curves, (b) CE-V curves, (c) EQE-L curves, (d) EL spectra of the devices.

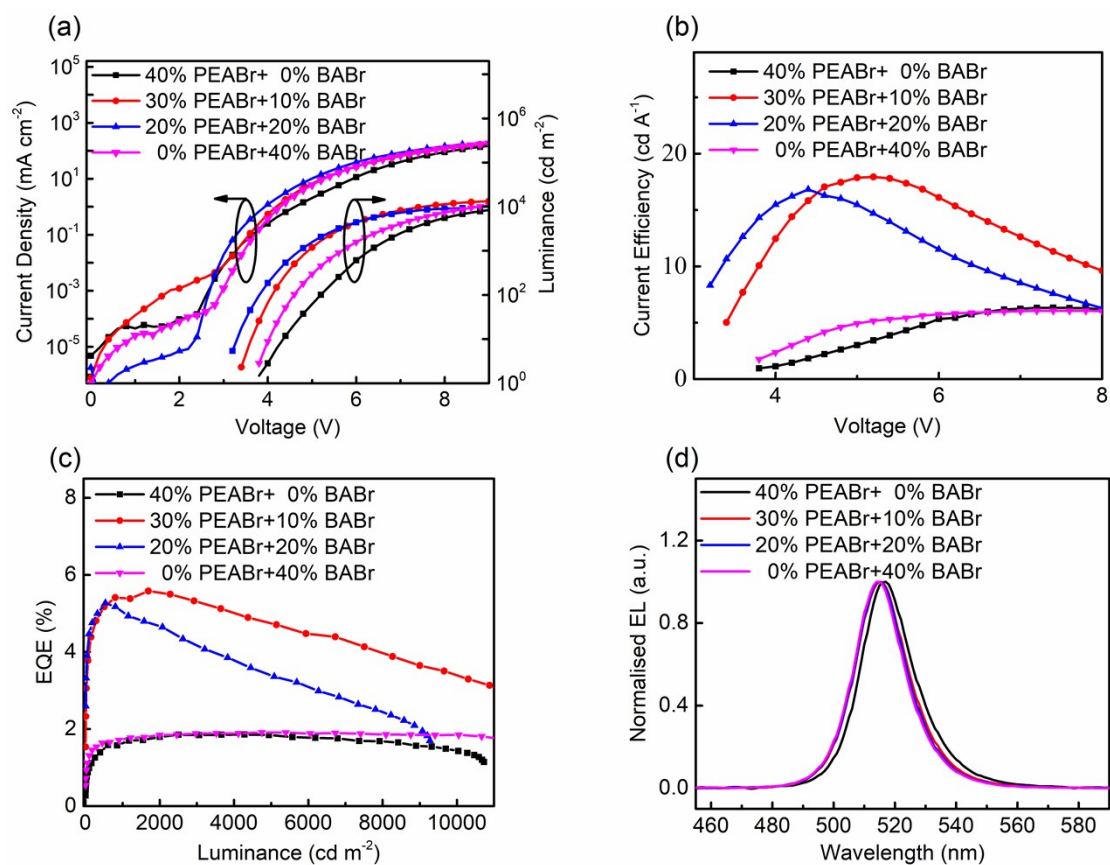

Figure S6. The device performance of the perovskite LEDs with different ratio of BABr:PEABr, here the total content of organic spacers is fixed at 40%. (a) J-L-V curves, (b) CE-V curves, (c) EQE-L curves, (d) EL spectra of the devices.

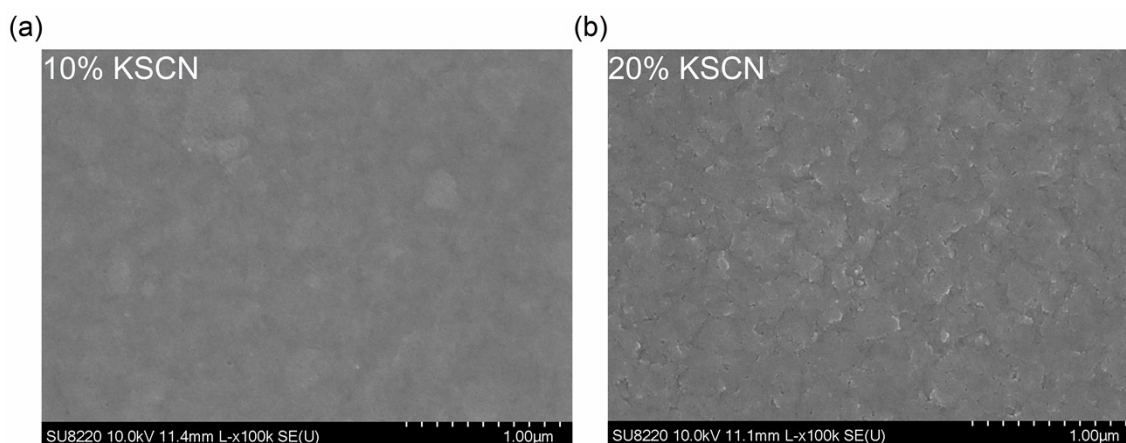

Figure S7. SEM images of the BABr-incorporated perovskite films with 10% and 20% KSCN.

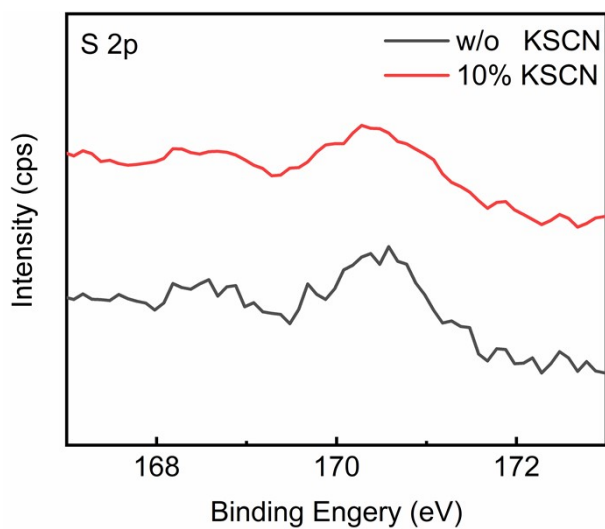

Figure S8. XPS spectra of S 2p for the BABr-incorporated perovskite films without and with 10% KSCN.

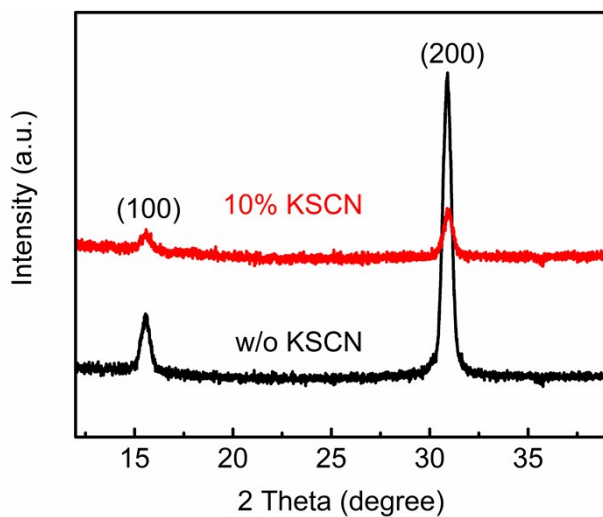

Figure S9. XRD spectra of the BABr-incorporated perovskite films without and with 10% KSCN.

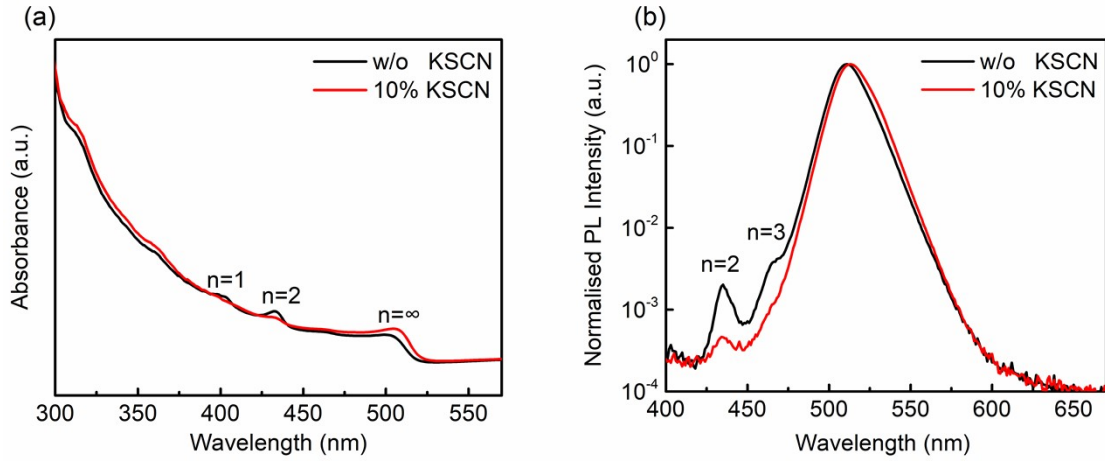

Figure S10. Absorption and PL spectra of the BABr-incorporated perovskite films without and with 10% KSCN.

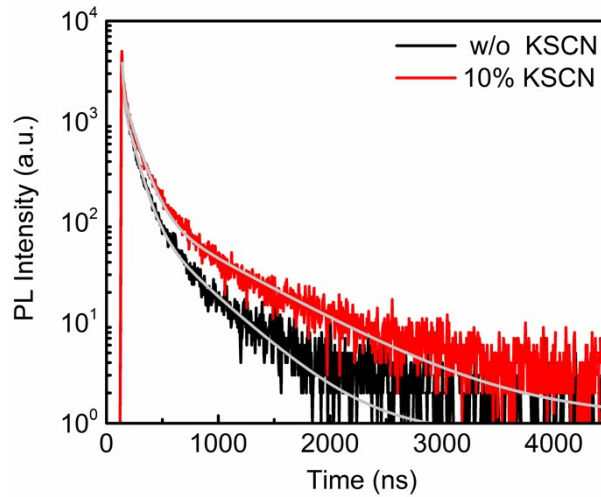

Figure S11. TRPL decays of the BABr-incorporated perovskite films without and with 10% KSCN.

**Table S3.** Summary of the fitting parameters obtained from TRPL decays and the determined  $k_{\text{rad}}$  and  $k_{\text{nonrad}}$  of the BABr-incorporated perovskite films without and with 10% KSCN.

| Sample   | $A_1$ | $\tau_1$<br>[ns] | $A_2$ | $\tau_2$<br>[ns] | $A_3$ | $\tau_3$<br>[ns] | $\tau_{\text{avg}}$<br>[ns] | $k_{\text{rad}} [10^6 \text{ s}^{-1}]$ | $k_{\text{nonrad}} [10^6 \text{ s}^{-1}]$ |
|----------|-------|------------------|-------|------------------|-------|------------------|-----------------------------|----------------------------------------|-------------------------------------------|
| 0% KSCN  | 0.11  | 10.0             | 0.64  | 91.3             | 0.25  | 428.6            | 166.7                       | 2.80                                   | 3.20                                      |
| 10% KSCN | 0.09  | 10.0             | 0.61  | 111.5            | 0.30  | 706.9            | 281.0                       | 2.46                                   | 1.10                                      |



**Table S4.** Summary of the performance parameters for the perovskite LEDs without and with 10% KSCN.

| Device   | $V_{\text{on}}$<br>[V] | $L_{\text{max}}$<br>[cd m <sup>-2</sup> ] | $CE_{\text{max}}$<br>[cd A <sup>-1</sup> ] | $EQE_{\text{max}}$<br>[%] | $EQE_{\text{avg}}$<br>[%] | EL peak<br>[nm] |
|----------|------------------------|-------------------------------------------|--------------------------------------------|---------------------------|---------------------------|-----------------|
| w/o KSCN | 3.0                    | 8794                                      | 29.2                                       | 9.1                       | 7.3                       | 514             |
| 10% KSCN | 3.0                    | 22040                                     | 59.7                                       | 16.3                      | 15.1                      | 521             |

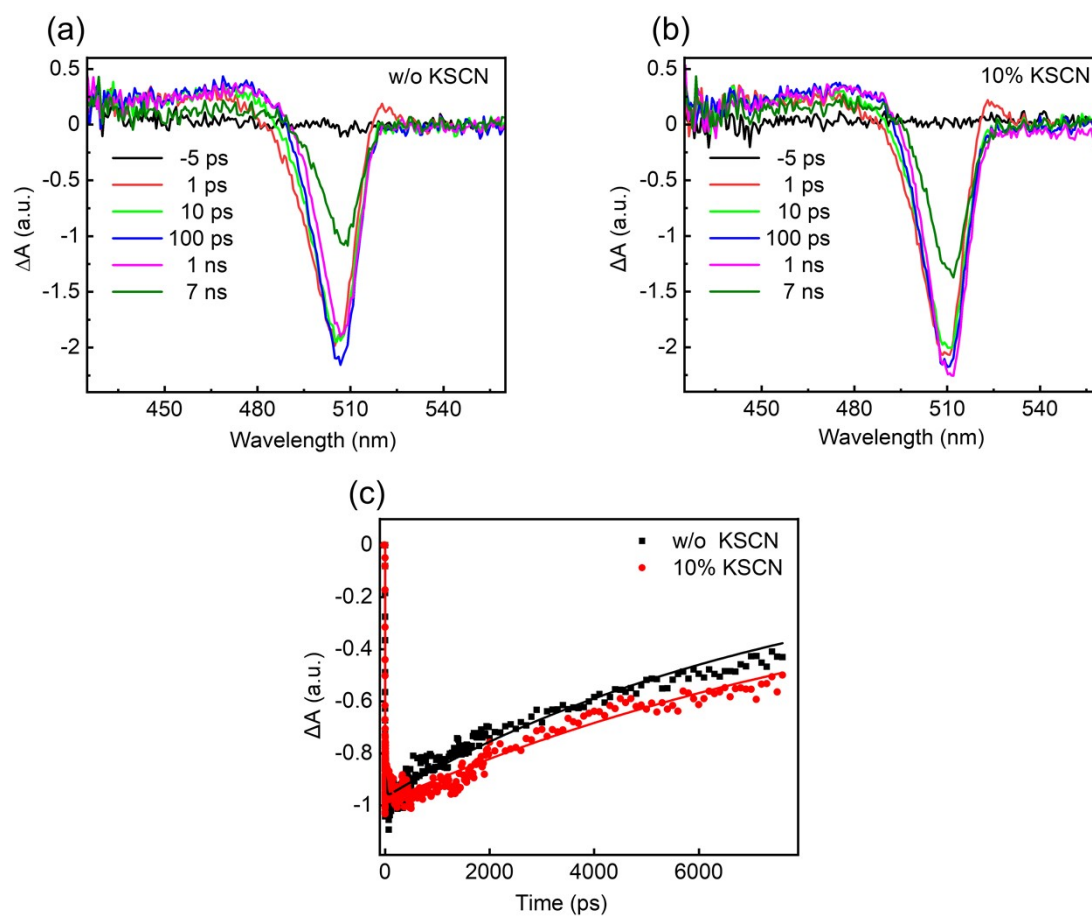

Figure S12. Selected TA spectra of the perovskite films without (a) and with 10% KSCN (b). (c) The transition kinetics for bleach peaks of the perovskite films without and with 10% KSCN at 506 nm and 510 nm, respectively.

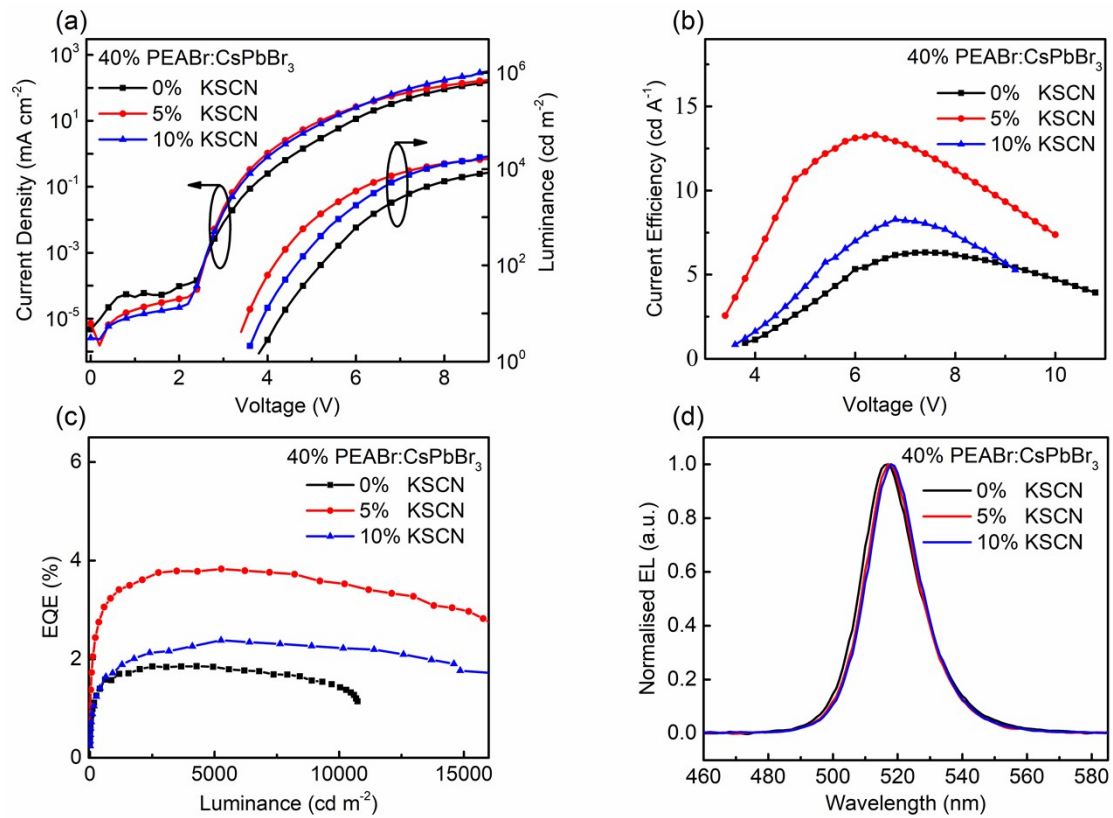

Figure S13. Device performances of the perovskite LEDs with different contents of KSCN alone. (a) J-L-V curves. (b) CE-V curves, (c) EQE-L curves, (d) EL spectra of the devices.

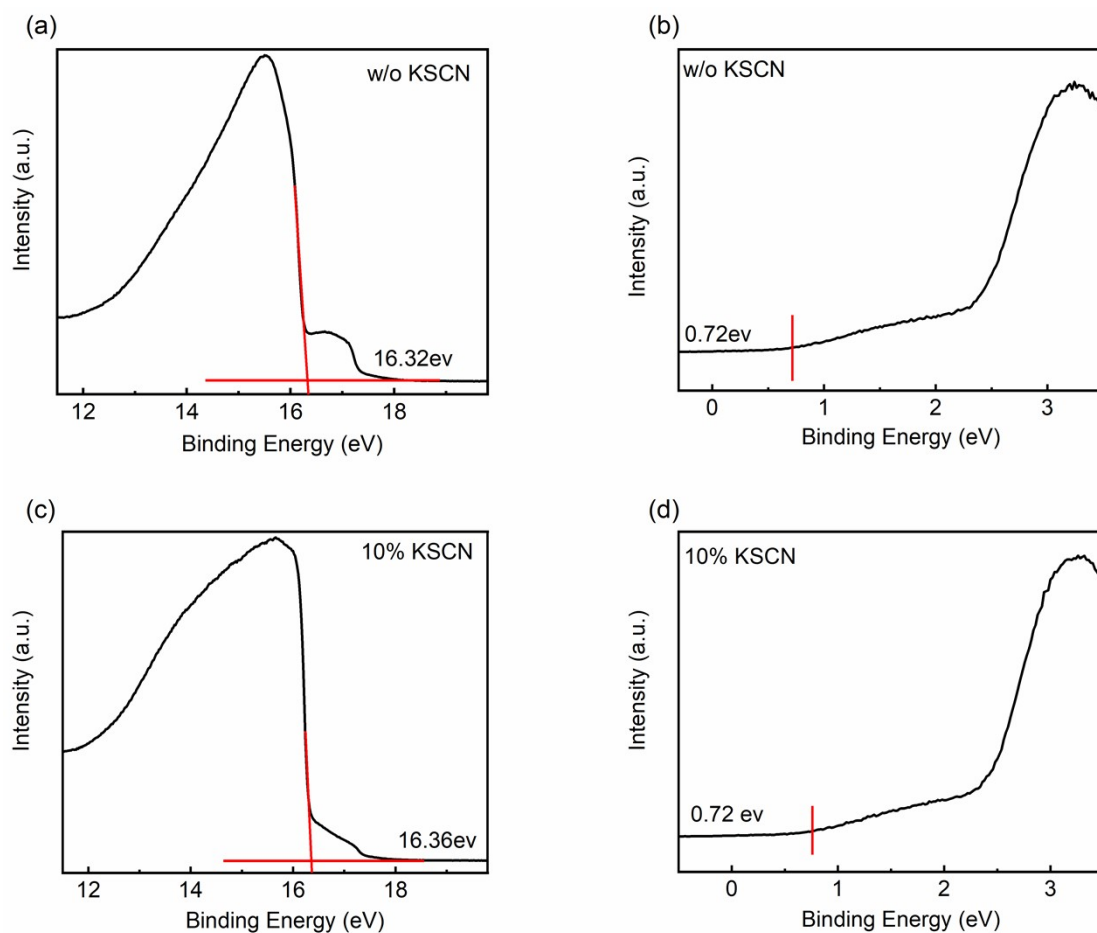

Figure S14. UPS secondary-electron cutoff and VB-edge regions of the BABr-incorporated perovskite films without and with 10% KSCN.

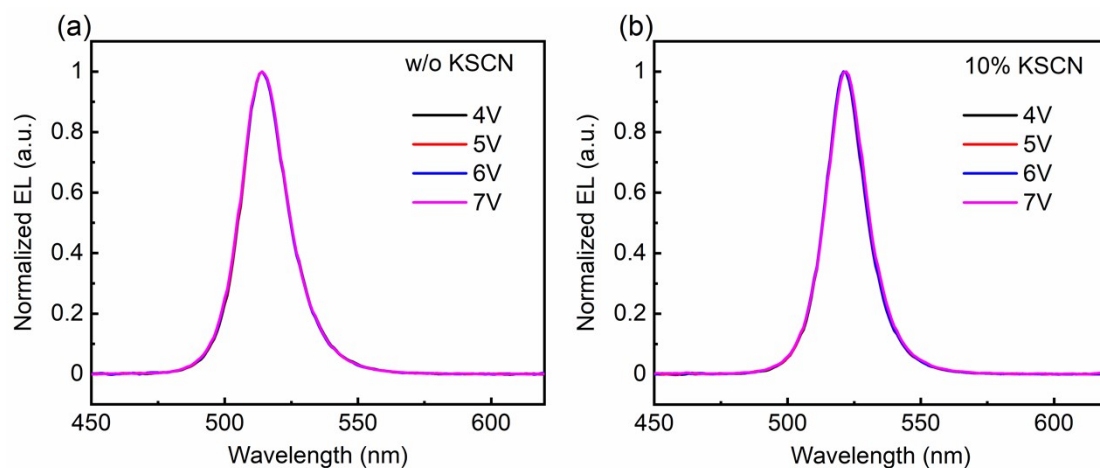

Fig. S15. EL spectra of the PeLEDs based on the BABr-incorporated films without and with 10% KSCN at the driven voltages ranging from 4 to 7V.

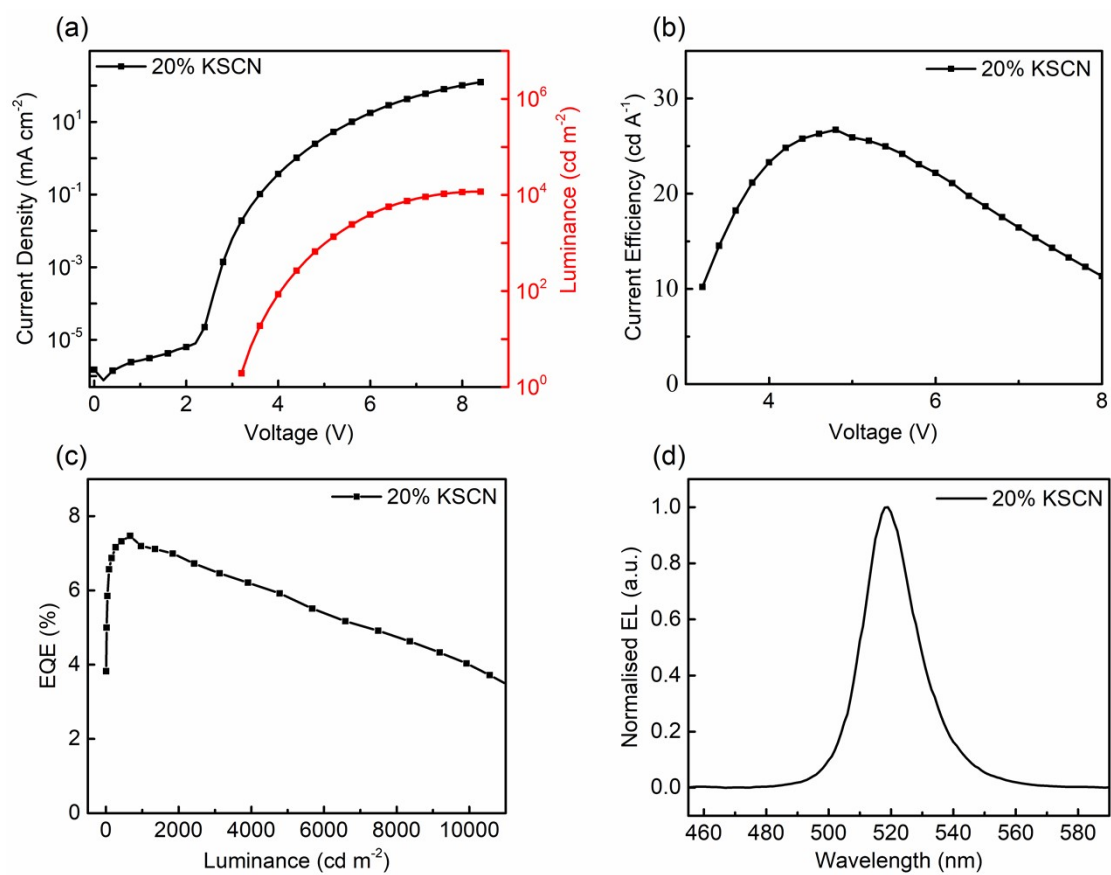

Figure S16. Device performances of the perovskite LEDs based on the BABr-incorporated film with 20% KSCN. (a) J-L-V curves. (b) CE-V curve, (c) EQE-L curve, (d) EL spectrum of the device.

Table S5. Summary of ASE properties of green quasi-2D perovskite thin films reported in the literature.

| Gain material                       | Pump source  | ASE Emission peak (nm) | ASE threshold ( $\mu\text{J cm}^{-2}$ ) | Ref.      |
|-------------------------------------|--------------|------------------------|-----------------------------------------|-----------|
| BABr:MAPbBr <sub>3</sub>            | 150fs, 400nm | 543                    | 13.6                                    | 1         |
| NMABr:FAPbBr <sub>3</sub>           | 150fs, 400nm | 530                    | 8.5                                     | 2         |
| BABr:FAPbBr <sub>3</sub>            | 150fs, 400nm | 550                    | 21.5                                    | 3         |
| PEABr:FAPbBr <sub>3</sub>           | 150fs, 400nm | 542                    | 4.2                                     | 4         |
| PEABr:FAPbBr <sub>3</sub>           | 3ns, 337nm   | 550                    | 33.1                                    | 5         |
| NMABr:FAPbBr <sub>3</sub>           | 3ns, 337nm   | 555                    | 16.7                                    | 5         |
| OABr:CsPbBr <sub>3</sub>            | 1ns, 355nm   | 535                    | 14.9                                    | 6         |
| PEABr:CsPbBr <sub>3</sub>           | 35fs, 400nm  | 534                    | 2.6                                     | 7         |
| PEABr:CsPbBr <sub>3</sub>           | 230fs, 343nm | 525                    | 12.5                                    | This work |
| BABr:PEABr:CsPbBr <sub>3</sub>      | 230fs, 343nm | 527                    | 9.8                                     | This work |
| KSCN:BABr:PEABr:CsPbBr <sub>3</sub> | 230fs, 343nm | 530                    | 2.6                                     | This work |

- 1 H. H. Zhang, Q. Liao, Y. S. Wu, Z. Y. Zhang, Q. G. Gao, P. Liu, M. L. Li, J. N. Yao, H. B. Fu, *Adv. Mater.*, 2018, **30**, 1706186.
- 2 M. Li, Q. Gao, P. Liu, Q. Liao, H. Zhang, J. Yao, W. Hu, Y. Wu, H. Fu, *Adv. Funct. Mater.*, 2018, **28**, 1707006.
- 3 H. H. Zhang, Y. S. Wu, Q. Liao, Z. Y. Zhang, Y. P. Liu, Q. G. Gao, P. Liu, M. L. Li, J. N. Yao, H. B. Fu, *Angew. Chem. Int. Ed.*, 2018, **57**, 7748.
- 4 L. Lei, D. Seyitliyev, S. Stuard, J. Mendes, Q. Dong, X. Fu, Y.-A. Chen, S. He, X. Yi, L. Zhu, C.-H. Chang, H. Ade, K. Gundogdu, F. So, *Adv. Mater.*, 2020, **32**, 1906571.
- 5 C. J. Qin, A. S. D. Sandanayaka, C. Y. Zhao, T. Matsushima, D. Z. Zhang, T. Fujihara, C. Adachi, *Nature*, 2020, **585**, 53.
- 6 J. Li, W. Zhou, L. Jiang, Z. Fang, Z. Yang, C. Lin, X. Xu, Z. Ye, H. Zhu, H. He, *J. Mater. Chem. C*, 2019, **7**, 15350.

7 M. Cui, C. Qin, Y. Jiang, M. Yuan, L. Xu, D. Song, Y. Jiang, Y. Liu, *J. Phys. Chem. Lett.*, 2020, **11**, 5734.
